# Supplementary material
Source: PubMed Central journal article supplement (PMC10233269)
Supplement: heckner_networkspecificity_supplement_bhac520.pdf [file heckner_networkspecificity_supplement_bhac520.pdf]

## *Supplement*

### **Predicting Executive Functioning from Functional Brain**

### **Connectivity: Network Specificity and Age Effects**

Marisa K. Heckner<sup>1,2\*</sup>, Edna C. Cieslik<sup>1,2</sup>, Kaustubh R. Patil<sup>1,2</sup>, Martin Gell<sup>1,3</sup>, Simon B. Eickhoff<sup>1,2</sup>, Felix Hoffstädter<sup>1,2</sup>, & Robert Langner<sup>1,2\*</sup>.

<sup>1</sup>Institute of Neuroscience and Medicine (INM-7: Brain and Behaviour), Research Centre Jülich,  
Jülich, Germany

<sup>2</sup>Institute of Systems Neuroscience, Medical Faculty, Heinrich Heine University Düsseldorf,  
Düsseldorf, Germany

<sup>3</sup>Department of Psychiatry, Psychotherapy and Psychosomatics, Medical Faculty, RWTH  
Aachen University, Aachen, Germany

\*Corresponding authors: Marisa Heckner or Robert Langner, Institute of Neuroscience and  
Medicine (INM-7), Research Centre Jülich, 52428 Jülich, Germany, tel.: +49 2461 61 96118, e-  
mail: m.heckner@fz-juelich.de (M.K.H.); r.langner@fz-juelich.de (R.L.)

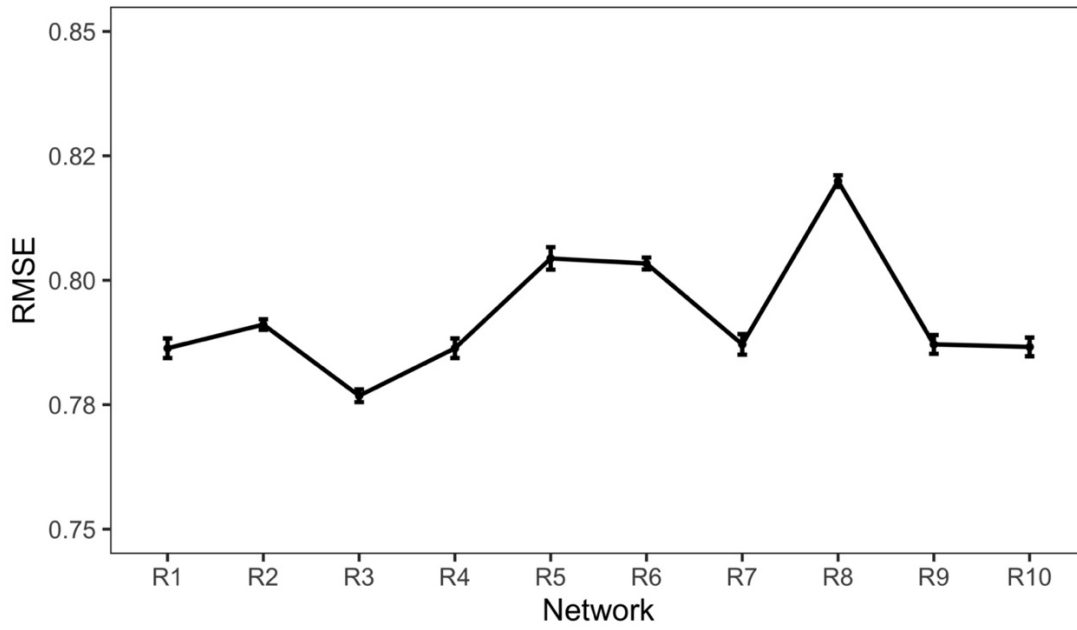

Figure S1. Prediction accuracy indicated by the root mean squared error (RMSE) for the 10 random networks (R1-R10) across task demand level and age groups.

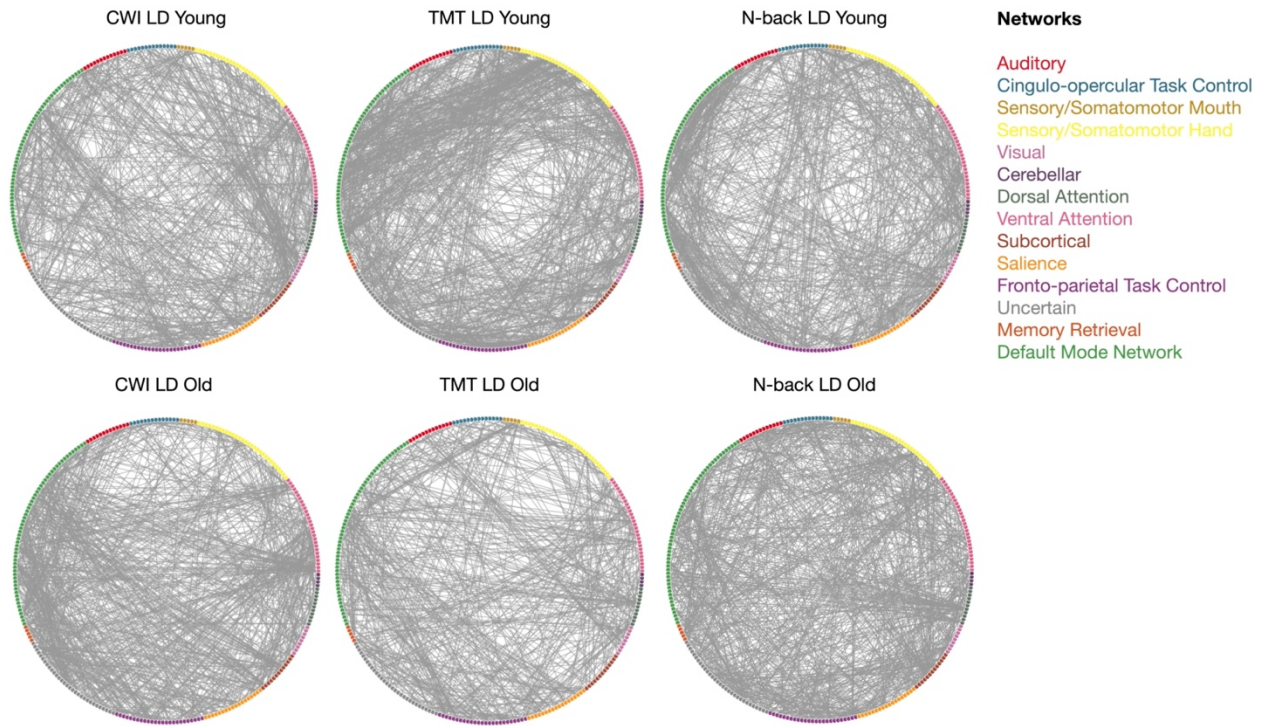

Figure S2. Features (i.e., resting-state functional connectivity edges), resulting from the data-driven feature selection approach that are significantly positively associated with the low demanding (LD) condition of each of the three executive function tests.

CWI = color word interference, TMT = trail making test, LD = low demanding test condition.

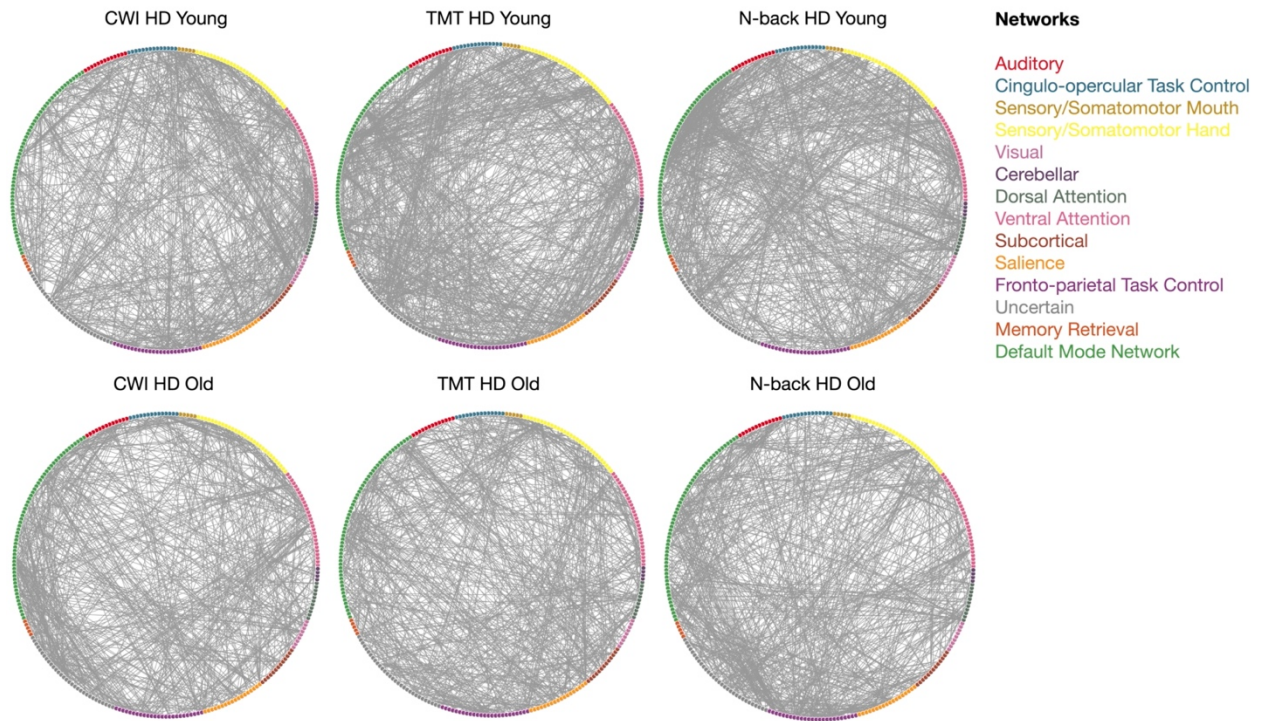

Figure S3. Features (i.e., resting-state functional connectivity edges), resulting from the data-driven feature selection approach that are significantly positively associated with the high demanding (HD) condition of each of the three executive function tests.

CWI = color word interference, TMT = trail making test.

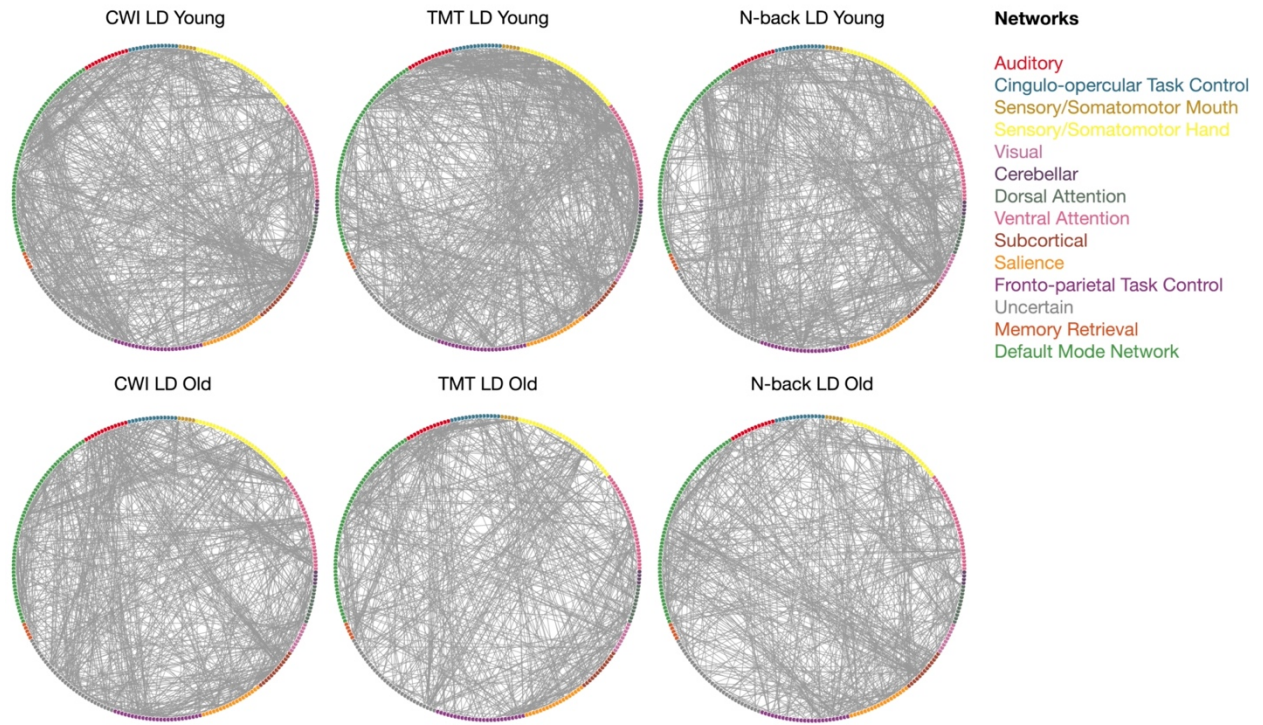

Figure S4. Features (i.e., resting-state functional connectivity edges), resulting from the data-driven feature selection approach that are significantly negatively associated with the low demanding (LD) condition of each of the three executive function tests.

CWI = color word interference, TMT = trail making test.



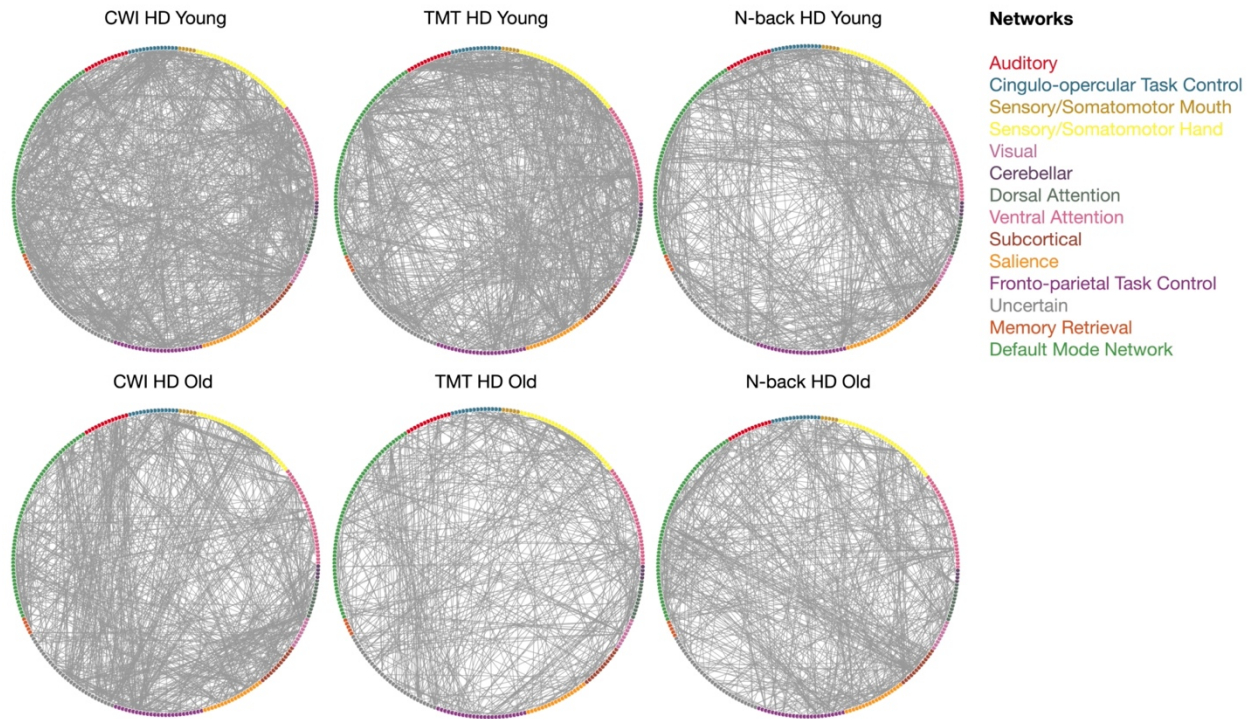

Figure S5. Features (i.e., resting-state functional connectivity edges), resulting from the data-driven feature selection approach that are significantly negatively associated with the high demanding (HD) condition of each of the three executive function tests.

CWI = color word interference, TMT = trail making test.

Table S1

*ANOVA Results from Resting-State Functional Connectivity without Global Signal Regression.*

| ANOVA Results                              | <i>F</i> -statistic | df            | <i>p</i> -value         | $\eta^2$ |
|--------------------------------------------|---------------------|---------------|-------------------------|----------|
| <i>Main Effects</i>                        |                     |               |                         |          |
| Network                                    | 2435.97             | 2, 43, 481.15 | $1.42 \times 10^{-270}$ | .925     |
| Demand Level                               | 3638.82             | 1, 198        | $2.09 \times 10^{-129}$ | .948     |
| Age                                        | 3370.75             | 1, 198        | $2.73 \times 10^{-126}$ | .945     |
| <i>Two-way Interactions</i>                |                     |               |                         |          |
| Age $\times$ Network                       | 482.99              | 3, 594        | $1.89 \times 10^{-213}$ | .709     |
| Age $\times$ Demand Level                  | 26891.64            | 1, 198        | $1.79 \times 10^{-226}$ | .993     |
| Network $\times$ Demand Level              | 3.16                | 2, 40, 474.79 | .034                    | .016     |
| <i>Three-way Interactions</i>              |                     |               |                         |          |
| Age $\times$ Network $\times$ Demand Level | 63.72               | 3, 594        | $9.93 \times 10^{-36}$  | .243     |

Table S2

*Post-hoc Pairwise Comparisons of ANOVA Effects from Resting-State Functional Connectivity without Global Signal Regression.*

| Post-hoc Pairwise Comparisons |                             |                                 |                         |
|-------------------------------|-----------------------------|---------------------------------|-------------------------|
| Factor                        | Mean (SE) <sub>group1</sub> | Mean (SE) <sub>group2</sub>     | <i>p</i> -value         |
| Age                           | .797 (.0003) <sub>old</sub> | .820 (.0003) <sub>young</sub>   | $2.73 \times 10^{-126}$ |
| Network                       | .818 (.0004) <sub>EF</sub>  | .825 (.0005) <sub>PercMot</sub> | $1.77 \times 10^{-20}$  |
|                               | .818 (.0004) <sub>EF</sub>  | .783 (.0003) <sub>Power</sub>   | $1.17 \times 10^{-132}$ |
|                               | .818 (.0004) <sub>EF</sub>  | .808 (.0001) <sub>Random</sub>  | $5.69 \times 10^{-54}$  |

|              |                                 |                                |                         |
|--------------|---------------------------------|--------------------------------|-------------------------|
|              | .825 (.0005) <sub>PercMot</sub> | .783 (.0003) <sub>Power</sub>  | $2.55 \times 10^{-146}$ |
|              | .825 (.0005) <sub>PercMot</sub> | .808 (.0001) <sub>Random</sub> | $8.12 \times 10^{-80}$  |
|              | .783 (.0003) <sub>Power</sub>   | .808 (.0001) <sub>Random</sub> | $1.48 \times 10^{-144}$ |
| Demand Level | .798 (.0002) <sub>HD</sub>      | .819 (.0003) <sub>LD</sub>     | $2.09 \times 10^{-129}$ |

*Note.* EF = executive-function-related network, PercMot = perceptuo-motor-related network, Power = Power et al.'s (2011) graph of putative functional areas, Random = average of 10 randomly computed brain networks, HD = high-demand, LD = low-demand, SE = standard error.

Table S3

*ANOVA Results from Resting-State Functional Connectivity with Correction for 24 Movement Parameters.*

| ANOVA Results                 | <i>F</i> -statistic | df            | <i>p</i> -value         | $\eta^2$ |
|-------------------------------|---------------------|---------------|-------------------------|----------|
| <i>Main Effects</i>           |                     |               |                         |          |
| Network                       | 1777.60             | 2, 07, 409.19 | $4.87 \times 10^{-205}$ | .900     |
| Demand Level                  | 2320.46             | 1, 198        | $2.68 \times 10^{-111}$ | .921     |
| Age                           | 1759.89             | 1, 198        | $1.81 \times 10^{-100}$ | .899     |
| <i>Two-way Interactions</i>   |                     |               |                         |          |
| Age × Network                 | 766.48              | 3, 594        | $1.03 \times 10^{-203}$ | .795     |
| Age × Demand Level            | 47411.88            | 1, 198        | $1.08 \times 10^{-237}$ | .996     |
| Network × Demand Level        | 27.65               | 2, 40, 476.06 | $6.67 \times 10^{-14}$  | .123     |
| <i>Three-way Interactions</i> |                     |               |                         |          |
| Age × Network × Demand Level  | 179.95              | 3, 594        | $5.49 \times 10^{-83}$  | .476     |



Table S4

*Post-hoc Pairwise Comparisons of ANOVA Effects from Resting-State Functional Connectivity with Correction for 24 Movement Parameters.*

| Post-hoc Pairwise Comparisons |                                 |                                 |                         |
|-------------------------------|---------------------------------|---------------------------------|-------------------------|
| Factor                        | Mean (SE) <sub>group1</sub>     | Mean (SE) <sub>group2</sub>     | <i>p</i> -value         |
| Age                           | .797 (.0002) <sub>old</sub>     | .785 (.0002) <sub>young</sub>   | $1.81 \times 10^{-100}$ |
| Network                       | .809 (.0004) <sub>EF</sub>      | .792 (.0004) <sub>PercMot</sub> | $3.52 \times 10^{-68}$  |
|                               | .809 (.0004) <sub>EF</sub>      | .776 (.0002) <sub>Power</sub>   | $1.82 \times 10^{-135}$ |
|                               | .809 (.0004) <sub>EF</sub>      | .788 (.0001) <sub>Random</sub>  | $3.54 \times 10^{-108}$ |
|                               | .792 (.0004) <sub>PercMot</sub> | .776 (.0002) <sub>Power</sub>   | $2.43 \times 10^{-89}$  |
|                               | .792 (.0004) <sub>PercMot</sub> | .788 (.0001) <sub>Random</sub>  | $8.25 \times 10^{-22}$  |
|                               | .776 (.0002) <sub>Power</sub>   | .788 (.0001) <sub>Random</sub>  | $5.93 \times 10^{-107}$ |
| Demand Level                  | .784 (.0002) <sub>HD</sub>      | .798 (.0002) <sub>LD</sub>      | $2.68 \times 10^{-111}$ |

*Note.* EF = executive-function-related network, PercMot = perceptuo-motor-related network, Power = Power et al.'s (2011) graph of putative functional areas, Random = average of 10 randomly computed brain networks, HD = high-demand, LD = low-demand, SE = standard error.

Table S5

*Results of Machine Learning Adjusted t-Tests, Corroborating the Main Effects of Age, Network, and Task Demand Level.*

| Factor       | Contrast           | t-statistic |
|--------------|--------------------|-------------|
| Age          | Old vs. Young      | 6.88**      |
| Network      | EF vs. PercMot     | 2.78*       |
|              | EF vs. Power       | 11.10**     |
|              | EF vs. Random      | 7.23**      |
|              | PercMot vs. Power  | 17.69**     |
|              | PercMot vs. Random | 2.56*       |
|              | Power vs. Random   | 14.30**     |
| Demand Level | High vs. Low       | 0.70        |

*Note.* EF = executive-function-related network, PercMot = perceptuo-motor-related network, Power = Power et al.'s (2011) graph of putative functional areas, Random = average of 10 randomly computed brain networks.

\*\*significant at  $p < .001$

\*significant at  $p < .05$

Table S6

*ANOVA Interaction Effects.*

| Age x Network    |         |              |
|------------------|---------|--------------|
| Age              | Network | Mean (SE)    |
| Old              | EFN     | .811 (.0006) |
|                  | PercMot | .808 (.0006) |
|                  | Power   | .767 (.0004) |
|                  | Random  | .783 (.0002) |
| Young            | EFN     | .829 (.0006) |
|                  | PercMot | .811 (.0006) |
|                  | Power   | .767 (.0004) |
|                  | Random  | .802 (.0002) |
| Age x Demand     |         |              |
| Age              | Demand  | Mean (SE)    |
| Old              | LD      | .771 (.0003) |
|                  | HD      | .814 (.0004) |
| Young            | LD      | .834 (.0003) |
|                  | HD      | .771 (.0004) |
| Network x Demand |         |              |
| Network          | Demand  | Mean (SE)    |
| 1                | LD      | .822 (.0006) |
|                  | HD      | .818 (.0007) |
|                  | LD      | .817 (.0005) |

|   |    |              |
|---|----|--------------|
| 2 | HD | .801 (.0006) |
| 3 | LD | .770 (.0004) |
|   | HD | .765 (.0004) |
| 4 | LD | .800 (.0002) |
|   | HD | .786 (.0002) |

*Note.* EFN = executive-function-related network, PercMot = perceptuo-motor-related network, Power = Power et al.'s (2011) graph of putative functional areas, Random = average of 10 randomly computed brain networks, HD = high-demand, LD = low-demand, SE = standard error.

Table S7

*Prediction Accuracies Displayed as Pearson's r, Mean Absolute Error and Root Mean Squared Error for Both Age Groups from Prediction within the Executive Function-related, the Perceptuo-motor Brain Network and the Full Connectome (i.e., Power et al.'s Graph of Putative Functional Areas) using Random Forest*

|                | r <sub>old</sub> | r <sub>young</sub> | MAE <sub>old</sub> | MAE <sub>young</sub> | RMSE <sub>old</sub> | RMSE <sub>young</sub> |
|----------------|------------------|--------------------|--------------------|----------------------|---------------------|-----------------------|
| <i>EFN</i>     |                  |                    |                    |                      |                     |                       |
| 0-back         | .07              | -.11               | .49                | .72                  | .62                 | .91                   |
| 1-back         | -.03             | -.10               | .54                | .70                  | .68                 | .91                   |
| CWI_con        | -.07             | -.14               | .72                | .75                  | .94                 | .93                   |
| CWI_inc        | -.03             | -.01               | .66                | .52                  | .85                 | .63                   |
| TMT_con        | -.01             | .09                | .53                | .44                  | .68                 | .55                   |
| TMT_switch     | .08              | -.17               | .59                | .52                  | .77                 | .66                   |
| <i>PercMot</i> |                  |                    |                    |                      |                     |                       |

|            |      |      |     |     |     |     |
|------------|------|------|-----|-----|-----|-----|
| 0-back     | .19  | -.09 | .48 | .71 | .61 | .91 |
| 1-back     | .16  | -.01 | .52 | .69 | .67 | .89 |
| CWI_con    | .03  | -.07 | .71 | .74 | .92 | .91 |
| CWI_inc    | -.08 | -.12 | .66 | .53 | .86 | .64 |
| TMT_con    | -.08 | .08  | .55 | .43 | .68 | .54 |
| TMT_switch | -.07 | -.18 | .62 | .52 | .80 | .66 |

---

*Power*

|            |      |      |     |     |     |     |
|------------|------|------|-----|-----|-----|-----|
| 0-back     | -.16 | -.13 | .50 | .71 | .63 | .91 |
| 1-back     | .04  | -.12 | .54 | .70 | .68 | .90 |
| CWI_con    | .03  | .23  | .71 | .72 | .92 | .88 |
| CWI_inc    | .13  | .08  | .65 | .51 | .84 | .62 |
| TMT_con    | .08  | .10  | .52 | .42 | .67 | .54 |
| TMT_switch | .01  | -.07 | .60 | .51 | .79 | .65 |

---

*Note.* MAE = mean absolute error, RMSE = root mean squared error, EFN = executive-function-related network, PercMot = perceptuo-motor-related network, Power = Power et al.'s (2011) graph of putative functional areas, CWI\_con = congruent condition of color word interference test, CWI\_inc = incongruent condition of color word interference test, TMT\_con = consecutive condition of trail making test, TMT\_switch = switching condition of trail making test.

Table S8

*Prediction Accuracies Displayed as Pearson's  $r$ , Mean Absolute Error and Root Mean Squared Error for Both Age Groups from Prediction within Power et al.'s (2012) Graph of Putative Functional Areas Using the Data-driven Feature Selection Algorithm Connectome-based Predictive Modeling*

|            | $r_{old}$ | $r_{young}$ | MAE <sub>old</sub> | MAE <sub>young</sub> | RMSE <sub>old</sub> | RMSE <sub>young</sub> |
|------------|-----------|-------------|--------------------|----------------------|---------------------|-----------------------|
| 0-back     | -.05      | -.07        | .52                | .75                  | .64                 | .96                   |
| 1-back     | .06       | .02         | .56                | .72                  | .69                 | .93                   |
| CWI_con    | .11       | .14         | .73                | .75                  | .93                 | .92                   |
| CWI_inc    | .03       | .03         | .68                | .53                  | .87                 | .64                   |
| TMT_con    | .01       | .08         | .55                | .44                  | .69                 | .55                   |
| TMT_switch | -.02      | -.07        | .61                | .53                  | .81                 | .67                   |

*Note.* MAE = mean absolute error, RMSE = root mean squared error, EFN = executive-function-related network, PercMot = perceptuo-motor-related network, Power = Power et al.'s (2011) graph of putative functional areas, CWI\_con = congruent condition of color word interference test, CWI\_inc = incongruent condition of color word interference test, TMT\_con = consecutive condition of trail making test, TMT\_switch = switching condition of trail making test.



Table S9

*Features (i.e., Resting-state Functional Connectivity Edges), Resulting from the Data-driven Feature Selection Approach that are Significantly Positively Associated with the High and Low Demanding Test Condition of the three Executive Function Tests Applied.*

|               | Network # | Assigned Name                  | Absolute # Edges | Relative # Edges (%) |
|---------------|-----------|--------------------------------|------------------|----------------------|
| <b>CWI_LD</b> |           |                                |                  |                      |
| <i>Young</i>  | -1        | Uncertain                      | 160              | 4.35                 |
|               | 1         | Sensory/Somatomotor Hand       | 111              | 2.81                 |
|               | 2         | Sensory/Somatomotor Mouth      | 37               | 5.63                 |
|               | 3         | Cingulo-opercular Task Control | 76               | 4.13                 |
|               | 4         | Auditory                       | 68               | 3.98                 |
|               | 5         | Default Mode Network           | 335              | 4.39                 |
|               | 6         | Memory Retrieval               | 25               | 3.80                 |
|               | 7         | Visual                         | 147              | 3.60                 |
|               | 8         | Fronto-parietal Task Control   | 134              | 4.08                 |
|               | 9         | Salience                       | 163              | 6.89                 |
|               | 10        | Subcortical                    | 61               | 3.57                 |
|               | 11        | Ventral Attention              | 91               | 7.69                 |
|               | 12        | Dorsal Attention               | 58               | 4.01                 |
|               | 13        | Cerebellar                     | 18               | 3.42                 |
| <i>Old</i>    | -1        | Uncertain                      | 242              | 6.57                 |
|               | 1         | Sensory/Somatomotor Hand       | 107              | 2.71                 |
|               | 2         | Sensory/Somatomotor Mouth      | 24               | 3.65                 |

|    |                                |     |      |
|----|--------------------------------|-----|------|
| 3  | Cingulo-opercular Task Control | 69  | 3.75 |
| 4  | Auditory                       | 71  | 4.15 |
| 5  | Default Mode Network           | 470 | 6.16 |
| 6  | Memory Retrieval               | 18  | 2.74 |
| 7  | Visual                         | 189 | 4.64 |
| 8  | Fronto-parietal Task Control   | 141 | 4.29 |
| 9  | Saliency                       | 136 | 5.75 |
| 10 | Subcortical                    | 43  | 2.52 |
| 11 | Ventral Attention              | 45  | 3.80 |
| 12 | Dorsal Attention               | 65  | 4.49 |
| 13 | Cerebellar                     | 16  | 3.04 |

---

CWI\_HD

---

|              |    |                                |     |      |
|--------------|----|--------------------------------|-----|------|
| <i>Young</i> | -1 | Uncertain                      | 160 | 5.11 |
|              | 1  | Sensory/Somatomotor Hand       | 111 | 3.98 |
|              | 2  | Sensory/Somatomotor Mouth      | 37  | 7.60 |
|              | 3  | Cingulo-opercular Task Control | 76  | 2.88 |
|              | 4  | Auditory                       | 68  | 3.69 |
|              | 5  | Default Mode Network           | 335 | 3.85 |
|              | 6  | Memory Retrieval               | 25  | 7.30 |
|              | 7  | Visual                         | 147 | 4.93 |
|              | 8  | Fronto-parietal Task Control   | 134 | 5.35 |
|              | 9  | Saliency                       | 163 | 5.28 |
|              | 10 | Subcortical                    | 61  | 8.72 |

|            |    |                                |     |      |
|------------|----|--------------------------------|-----|------|
|            | 11 | Ventral Attention              | 91  | 7.10 |
|            | 12 | Dorsal Attention               | 58  | 4.84 |
|            | 13 | Cerebellar                     | 18  | 7.79 |
| <i>Old</i> | -1 | Uncertain                      | 242 | 3.88 |
|            | 1  | Sensory/Somatomotor Hand       | 107 | 3.85 |
|            | 2  | Sensory/Somatomotor Mouth      | 24  | 3.04 |
|            | 3  | Cingulo-opercular Task Control | 69  | 3.37 |
|            | 4  | Auditory                       | 71  | 4.74 |
|            | 5  | Default Mode Network           | 470 | 4.65 |
|            | 6  | Memory Retrieval               | 18  | 5.93 |
|            | 7  | Visual                         | 189 | 3.97 |
|            | 8  | Fronto-parietal Task Control   | 141 | 3.65 |
|            | 9  | Saliency                       | 136 | 3.21 |
|            | 10 | Subcortical                    | 43  | 4.04 |
|            | 11 | Ventral Attention              | 45  | 4.48 |
|            | 12 | Dorsal Attention               | 65  | 2.83 |
|            | 13 | Cerebellar                     | 16  | 2.66 |

---

TMT\_LD

---

|              |    |                                |     |      |
|--------------|----|--------------------------------|-----|------|
| <i>Young</i> | -1 | Uncertain                      | 160 | 5.81 |
|              | 1  | Sensory/Somatomotor Hand       | 111 | 6.87 |
|              | 2  | Sensory/Somatomotor Mouth      | 37  | 4.71 |
|              | 3  | Cingulo-opercular Task Control | 76  | 3.31 |
|              | 4  | Auditory                       | 68  | 3.28 |

|            |    |                                |     |      |
|------------|----|--------------------------------|-----|------|
|            | 5  | Default Mode Network           | 335 | 6.52 |
|            | 6  | Memory Retrieval               | 25  | 6.24 |
|            | 7  | Visual                         | 147 | 5.94 |
|            | 8  | Fronto-parietal Task Control   | 134 | 5.41 |
|            | 9  | Saliency                       | 163 | 4.82 |
|            | 10 | Subcortical                    | 61  | 5.50 |
|            | 11 | Ventral Attention              | 91  | 5.15 |
|            | 12 | Dorsal Attention               | 58  | 4.08 |
|            | 13 | Cerebellar                     | 18  | 3.61 |
| <i>Old</i> | -1 | Uncertain                      | 242 | 3.91 |
|            | 1  | Sensory/Somatomotor Hand       | 107 | 1.75 |
|            | 2  | Sensory/Somatomotor Mouth      | 24  | 1.67 |
|            | 3  | Cingulo-opercular Task Control | 69  | 3.10 |
|            | 4  | Auditory                       | 71  | 2.75 |
|            | 5  | Default Mode Network           | 470 | 4.33 |
|            | 6  | Memory Retrieval               | 18  | 2.74 |
|            | 7  | Visual                         | 189 | 3.46 |
|            | 8  | Fronto-parietal Task Control   | 141 | 3.92 |
|            | 9  | Saliency                       | 136 | 2.41 |
|            | 10 | Subcortical                    | 43  | 3.63 |
|            | 11 | Ventral Attention              | 45  | 4.06 |
|            | 12 | Dorsal Attention               | 65  | 5.74 |
|            | 13 | Cerebellar                     | 16  | 1.71 |

---

---

TMT\_HD

---

|              |    |                                |     |      |
|--------------|----|--------------------------------|-----|------|
| <i>Young</i> | -1 | Uncertain                      | 160 | 5.73 |
|              | 1  | Sensory/Somatomotor Hand       | 111 | 4.92 |
|              | 2  | Sensory/Somatomotor Mouth      | 37  | 7.15 |
|              | 3  | Cingulo-opercular Task Control | 76  | 4.07 |
|              | 4  | Auditory                       | 68  | 2.28 |
|              | 5  | Default Mode Network           | 335 | 6.12 |
|              | 6  | Memory Retrieval               | 25  | 9.73 |
|              | 7  | Visual                         | 147 | 6.01 |
|              | 8  | Fronto-parietal Task Control   | 134 | 6.27 |
|              | 9  | Salience                       | 163 | 3.80 |
|              | 10 | Subcortical                    | 61  | 4.04 |
|              | 11 | Ventral Attention              | 91  | 3.89 |
|              | 12 | Dorsal Attention               | 58  | 4.42 |
|              | 13 | Cerebellar                     | 18  | 4.56 |
| <i>Old</i>   | -1 | Uncertain                      | 242 | 3.45 |
|              | 1  | Sensory/Somatomotor Hand       | 107 | 3.88 |
|              | 2  | Sensory/Somatomotor Mouth      | 24  | 4.56 |
|              | 3  | Cingulo-opercular Task Control | 69  | 3.15 |
|              | 4  | Auditory                       | 71  | 5.32 |
|              | 5  | Default Mode Network           | 470 | 3.88 |
|              | 6  | Memory Retrieval               | 18  | 3.95 |
|              | 7  | Visual                         | 189 | 3.19 |

|    |                              |     |      |
|----|------------------------------|-----|------|
| 8  | Fronto-parietal Task Control | 141 | 4.78 |
| 9  | Saliency                     | 136 | 4.94 |
| 10 | Subcortical                  | 43  | 3.98 |
| 11 | Ventral Attention            | 45  | 3.46 |
| 12 | Dorsal Attention             | 65  | 4.84 |
| 13 | Cerebellar                   | 16  | 3.61 |

---

N-back\_LD

---

|              |    |                                |     |      |
|--------------|----|--------------------------------|-----|------|
| <i>Young</i> | -1 | Uncertain                      | 160 | 4.62 |
|              | 1  | Sensory/Somatomotor Hand       | 111 | 4.11 |
|              | 2  | Sensory/Somatomotor Mouth      | 37  | 3.80 |
|              | 3  | Cingulo-opercular Task Control | 76  | 4.51 |
|              | 4  | Auditory                       | 68  | 5.56 |
|              | 5  | Default Mode Network           | 335 | 5.15 |
|              | 6  | Memory Retrieval               | 25  | 4.11 |
|              | 7  | Visual                         | 147 | 5.72 |
|              | 8  | Fronto-parietal Task Control   | 134 | 4.65 |
|              | 9  | Saliency                       | 163 | 3.51 |
|              | 10 | Subcortical                    | 61  | 5.03 |
|              | 11 | Ventral Attention              | 91  | 5.75 |
|              | 12 | Dorsal Attention               | 58  | 4.98 |
|              | 13 | Cerebellar                     | 18  | 3.42 |
| <i>Old</i>   | -1 | Uncertain                      | 242 | 5.13 |
|              | 1  | Sensory/Somatomotor Hand       | 107 | 5.12 |



|    |                                |     |      |
|----|--------------------------------|-----|------|
| 2  | Sensory/Somatomotor Mouth      | 24  | 4.56 |
| 3  | Cingulo-opercular Task Control | 69  | 5.70 |
| 4  | Auditory                       | 71  | 5.79 |
| 5  | Default Mode Network           | 470 | 4.88 |
| 6  | Memory Retrieval               | 18  | 4.71 |
| 7  | Visual                         | 189 | 5.59 |
| 8  | Fronto-parietal Task Control   | 141 | 4.96 |
| 9  | Salience                       | 136 | 6.29 |
| 10 | Subcortical                    | 43  | 6.14 |
| 11 | Ventral Attention              | 45  | 4.65 |
| 12 | Dorsal Attention               | 65  | 7.40 |
| 13 | Cerebellar                     | 16  | 4.56 |

---

N-back\_HD

---

|              |    |                                |     |      |
|--------------|----|--------------------------------|-----|------|
| <i>Young</i> | -1 | Uncertain                      | 160 | 5.02 |
|              | 1  | Sensory/Somatomotor Hand       | 111 | 4.64 |
|              | 2  | Sensory/Somatomotor Mouth      | 37  | 4.41 |
|              | 3  | Cingulo-opercular Task Control | 76  | 6.03 |
|              | 4  | Auditory                       | 68  | 6.79 |
|              | 5  | Default Mode Network           | 335 | 6.24 |
|              | 6  | Memory Retrieval               | 25  | 7.30 |
|              | 7  | Visual                         | 147 | 2.77 |
|              | 8  | Fronto-parietal Task Control   | 134 | 4.41 |
|              | 9  | Salience                       | 163 | 3.21 |

|            |    |                                |     |      |
|------------|----|--------------------------------|-----|------|
|            | 10 | Subcortical                    | 61  | 3.57 |
|            | 11 | Ventral Attention              | 91  | 4.22 |
|            | 12 | Dorsal Attention               | 58  | 6.84 |
|            | 13 | Cerebellar                     | 18  | 2.85 |
| <i>Old</i> | -1 | Uncertain                      | 242 | 3.39 |
|            | 1  | Sensory/Somatomotor Hand       | 107 | 3.80 |
|            | 2  | Sensory/Somatomotor Mouth      | 24  | 4.11 |
|            | 3  | Cingulo-opercular Task Control | 69  | 3.04 |
|            | 4  | Auditory                       | 71  | 4.21 |
|            | 5  | Default Mode Network           | 470 | 4.13 |
|            | 6  | Memory Retrieval               | 18  | 2.13 |
|            | 7  | Visual                         | 189 | 5.96 |
|            | 8  | Fronto-parietal Task Control   | 141 | 4.68 |
|            | 9  | Saliency                       | 136 | 2.83 |
|            | 10 | Subcortical                    | 43  | 2.46 |
|            | 11 | Ventral Attention              | 45  | 1.44 |
|            | 12 | Dorsal Attention               | 65  | 4.70 |
|            | 13 | Cerebellar                     | 16  | 3.42 |

---

*Note.* # = number, CWI = color-word interference test, TMT = trail making test, LD = low demanding test condition, HD = high demanding test condition.

Table S10

*Features (i.e., Resting-state Functional Connectivity Edges), Resulting from the Data-driven Feature Selection Approach that are Significantly Negatively Associated with the High and Low Demanding Test Condition of the three Executive Function Tests Applied.*

|               | Network # | Assigned Name                  | Absolute # Edges | Relative # Edges (%) |
|---------------|-----------|--------------------------------|------------------|----------------------|
| <b>CWI_LD</b> |           |                                |                  |                      |
| <i>Young</i>  | -1        | Uncertain                      | 160              | 4.51                 |
|               | 1         | Sensory/Somatomotor Hand       | 111              | 3.70                 |
|               | 2         | Sensory/Somatomotor Mouth      | 37               | 5.78                 |
|               | 3         | Cingulo-opercular Task Control | 76               | 4.67                 |
|               | 4         | Auditory                       | 68               | 4.50                 |
|               | 5         | Default Mode Network           | 335              | 5.40                 |
|               | 6         | Memory Retrieval               | 25               | 5.78                 |
|               | 7         | Visual                         | 147              | 4.27                 |
|               | 8         | Fronto-parietal Task Control   | 134              | 4.08                 |
|               | 9         | Salience                       | 163              | 6.55                 |
|               | 10        | Subcortical                    | 61               | 5.32                 |
|               | 11        | Ventral Attention              | 91               | 8.37                 |
|               | 12        | Dorsal Attention               | 58               | 4.29                 |
|               | 13        | Cerebellar                     | 18               | 3.04                 |
| <i>Old</i>    | -1        | Uncertain                      | 242              | 6.19                 |
|               | 1         | Sensory/Somatomotor Hand       | 107              | 3.04                 |
|               | 2         | Sensory/Somatomotor Mouth      | 24               | 3.50                 |

|    |                                |     |      |
|----|--------------------------------|-----|------|
| 3  | Cingulo-opercular Task Control | 69  | 6.63 |
| 4  | Auditory                       | 71  | 4.86 |
| 5  | Default Mode Network           | 470 | 4.14 |
| 6  | Memory Retrieval               | 18  | 7.15 |
| 7  | Visual                         | 189 | 5.81 |
| 8  | Fronto-parietal Task Control   | 141 | 4.26 |
| 9  | Saliience                      | 136 | 7.27 |
| 10 | Subcortical                    | 43  | 4.04 |
| 11 | Ventral Attention              | 45  | 3.30 |
| 12 | Dorsal Attention               | 65  | 3.18 |
| 13 | Cerebellar                     | 16  | 2.85 |

---

CWI\_HD

---

|              |    |                                |     |      |
|--------------|----|--------------------------------|-----|------|
| <i>Young</i> | -1 | Uncertain                      | 160 | 6.22 |
|              | 1  | Sensory/Somatomotor Hand       | 111 | 4.71 |
|              | 2  | Sensory/Somatomotor Mouth      | 37  | 9.13 |
|              | 3  | Cingulo-opercular Task Control | 76  | 3.37 |
|              | 4  | Auditory                       | 68  | 6.08 |
|              | 5  | Default Mode Network           | 335 | 5.83 |
|              | 6  | Memory Retrieval               | 25  | 4.56 |
|              | 7  | Visual                         | 147 | 5.64 |
|              | 8  | Fronto-parietal Task Control   | 134 | 5.54 |
|              | 9  | Saliience                      | 163 | 4.73 |
|              | 10 | Subcortical                    | 61  | 7.08 |

|            |    |                                |     |      |
|------------|----|--------------------------------|-----|------|
|            | 11 | Ventral Attention              | 91  | 9.80 |
|            | 12 | Dorsal Attention               | 58  | 3.80 |
|            | 13 | Cerebellar                     | 18  | 6.46 |
| <i>Old</i> | -1 | Uncertain                      | 242 | 3.53 |
|            | 1  | Sensory/Somatomotor Hand       | 107 | 4.49 |
|            | 2  | Sensory/Somatomotor Mouth      | 24  | 3.80 |
|            | 3  | Cingulo-opercular Task Control | 69  | 5.32 |
|            | 4  | Auditory                       | 71  | 4.04 |
|            | 5  | Default Mode Network           | 470 | 3.68 |
|            | 6  | Memory Retrieval               | 18  | 7.45 |
|            | 7  | Visual                         | 189 | 6.82 |
|            | 8  | Fronto-parietal Task Control   | 141 | 4.05 |
|            | 9  | Saliency                       | 136 | 4.86 |
|            | 10 | Subcortical                    | 43  | 4.27 |
|            | 11 | Ventral Attention              | 45  | 4.82 |
|            | 12 | Dorsal Attention               | 65  | 4.63 |
|            | 13 | Cerebellar                     | 16  | 3.80 |

---

TMT\_LD

---

|              |    |                                |     |      |
|--------------|----|--------------------------------|-----|------|
| <i>Young</i> | -1 | Uncertain                      | 160 | 6.95 |
|              | 1  | Sensory/Somatomotor Hand       | 111 | 7.20 |
|              | 2  | Sensory/Somatomotor Mouth      | 37  | 7.00 |
|              | 3  | Cingulo-opercular Task Control | 76  | 7.17 |
|              | 4  | Auditory                       | 68  | 6.08 |

|            |    |                                |     |      |
|------------|----|--------------------------------|-----|------|
|            | 5  | Default Mode Network           | 335 | 4.06 |
|            | 6  | Memory Retrieval               | 25  | 1.98 |
|            | 7  | Visual                         | 147 | 5.32 |
|            | 8  | Fronto-parietal Task Control   | 134 | 4.62 |
|            | 9  | Saliency                       | 163 | 6.21 |
|            | 10 | Subcortical                    | 61  | 4.45 |
|            | 11 | Ventral Attention              | 91  | 6.42 |
|            | 12 | Dorsal Attention               | 58  | 4.56 |
|            | 13 | Cerebellar                     | 18  | 4.75 |
| <i>Old</i> | -1 | Uncertain                      | 242 | 2.85 |
|            | 1  | Sensory/Somatomotor Hand       | 107 | 3.02 |
|            | 2  | Sensory/Somatomotor Mouth      | 24  | 3.04 |
|            | 3  | Cingulo-opercular Task Control | 69  | 5.11 |
|            | 4  | Auditory                       | 71  | 3.33 |
|            | 5  | Default Mode Network           | 470 | 3.47 |
|            | 6  | Memory Retrieval               | 18  | 3.04 |
|            | 7  | Visual                         | 189 | 3.19 |
|            | 8  | Fronto-parietal Task Control   | 141 | 3.92 |
|            | 9  | Saliency                       | 136 | 3.55 |
|            | 10 | Subcortical                    | 43  | 5.03 |
|            | 11 | Ventral Attention              | 45  | 4.39 |
|            | 12 | Dorsal Attention               | 65  | 4.22 |
|            | 13 | Cerebellar                     | 16  | 1.71 |

---



---

TMT\_HD

---

|              |    |                                |     |      |
|--------------|----|--------------------------------|-----|------|
| <i>Young</i> | -1 | Uncertain                      | 160 | 5.19 |
|              | 1  | Sensory/Somatomotor Hand       | 111 | 7.40 |
|              | 2  | Sensory/Somatomotor Mouth      | 37  | 7.45 |
|              | 3  | Cingulo-opercular Task Control | 76  | 5.76 |
|              | 4  | Auditory                       | 68  | 5.15 |
|              | 5  | Default Mode Network           | 335 | 4.86 |
|              | 6  | Memory Retrieval               | 25  | 2.89 |
|              | 7  | Visual                         | 147 | 4.07 |
|              | 8  | Fronto-parietal Task Control   | 134 | 5.90 |
|              | 9  | Salience                       | 163 | 5.49 |
|              | 10 | Subcortical                    | 61  | 3.74 |
|              | 11 | Ventral Attention              | 91  | 6.59 |
|              | 12 | Dorsal Attention               | 58  | 4.36 |
|              | 13 | Cerebellar                     | 18  | 5.70 |
| <i>Old</i>   | -1 | Uncertain                      | 242 | 3.37 |
|              | 1  | Sensory/Somatomotor Hand       | 107 | 4.46 |
|              | 2  | Sensory/Somatomotor Mouth      | 24  | 2.43 |
|              | 3  | Cingulo-opercular Task Control | 69  | 2.61 |
|              | 4  | Auditory                       | 71  | 3.33 |
|              | 5  | Default Mode Network           | 470 | 3.07 |
|              | 6  | Memory Retrieval               | 18  | 2.43 |
|              | 7  | Visual                         | 189 | 3.70 |

|    |                              |     |      |
|----|------------------------------|-----|------|
| 8  | Fronto-parietal Task Control | 141 | 3.89 |
| 9  | Saliency                     | 136 | 2.45 |
| 10 | Subcortical                  | 43  | 3.86 |
| 11 | Ventral Attention            | 45  | 3.55 |
| 12 | Dorsal Attention             | 65  | 2.97 |
| 13 | Cerebellar                   | 16  | 2.09 |

---

N-back\_LD

---

|              |    |                                |     |      |
|--------------|----|--------------------------------|-----|------|
| <i>Young</i> | -1 | Uncertain                      | 160 | 3.50 |
|              | 1  | Sensory/Somatomotor Hand       | 111 | 4.64 |
|              | 2  | Sensory/Somatomotor Mouth      | 37  | 7.00 |
|              | 3  | Cingulo-opercular Task Control | 76  | 7.50 |
|              | 4  | Auditory                       | 68  | 6.84 |
|              | 5  | Default Mode Network           | 335 | 3.23 |
|              | 6  | Memory Retrieval               | 25  | 2.89 |
|              | 7  | Visual                         | 147 | 6.30 |
|              | 8  | Fronto-parietal Task Control   | 134 | 4.26 |
|              | 9  | Saliency                       | 163 | 4.10 |
|              | 10 | Subcortical                    | 61  | 3.39 |
|              | 11 | Ventral Attention              | 91  | 8.03 |
|              | 12 | Dorsal Attention               | 58  | 5.95 |
|              | 13 | Cerebellar                     | 18  | 3.23 |
| <i>Old</i>   | -1 | Uncertain                      | 242 | 5.24 |
|              | 1  | Sensory/Somatomotor Hand       | 107 | 4.94 |

|    |                                |     |      |
|----|--------------------------------|-----|------|
| 2  | Sensory/Somatomotor Mouth      | 24  | 3.65 |
| 3  | Cingulo-opercular Task Control | 69  | 4.45 |
| 4  | Auditory                       | 71  | 5.26 |
| 5  | Default Mode Network           | 470 | 5.51 |
| 6  | Memory Retrieval               | 18  | 5.32 |
| 7  | Visual                         | 189 | 4.22 |
| 8  | Fronto-parietal Task Control   | 141 | 5.05 |
| 9  | Salience                       | 136 | 4.35 |
| 10 | Subcortical                    | 43  | 5.15 |
| 11 | Ventral Attention              | 45  | 4.31 |
| 12 | Dorsal Attention               | 65  | 4.42 |
| 13 | Cerebellar                     | 16  | 4.75 |

---

N-back\_HD

---

|              |    |                                |     |      |
|--------------|----|--------------------------------|-----|------|
| <i>Young</i> | -1 | Uncertain                      | 160 | 3.45 |
|              | 1  | Sensory/Somatomotor Hand       | 111 | 4.18 |
|              | 2  | Sensory/Somatomotor Mouth      | 37  | 4.87 |
|              | 3  | Cingulo-opercular Task Control | 76  | 5.98 |
|              | 4  | Auditory                       | 68  | 5.50 |
|              | 5  | Default Mode Network           | 335 | 4.94 |
|              | 6  | Memory Retrieval               | 25  | 4.11 |
|              | 7  | Visual                         | 147 | 3.19 |
|              | 8  | Fronto-parietal Task Control   | 134 | 3.98 |
|              | 9  | Salience                       | 163 | 5.24 |

|            |    |                                |     |      |
|------------|----|--------------------------------|-----|------|
|            | 10 | Subcortical                    | 61  | 4.74 |
|            | 11 | Ventral Attention              | 91  | 4.48 |
|            | 12 | Dorsal Attention               | 58  | 5.05 |
|            | 13 | Cerebellar                     | 18  | 2.28 |
| <i>Old</i> | -1 | Uncertain                      | 242 | 3.07 |
|            | 1  | Sensory/Somatomotor Hand       | 107 | 2.66 |
|            | 2  | Sensory/Somatomotor Mouth      | 24  | 2.43 |
|            | 3  | Cingulo-opercular Task Control | 69  | 3.69 |
|            | 4  | Auditory                       | 71  | 2.69 |
|            | 5  | Default Mode Network           | 470 | 4.50 |
|            | 6  | Memory Retrieval               | 18  | 2.59 |
|            | 7  | Visual                         | 189 | 3.43 |
|            | 8  | Fronto-parietal Task Control   | 141 | 4.87 |
|            | 9  | Saliency                       | 136 | 5.37 |
|            | 10 | Subcortical                    | 43  | 3.80 |
|            | 11 | Ventral Attention              | 45  | 2.62 |
|            | 12 | Dorsal Attention               | 65  | 3.25 |
|            | 13 | Cerebellar                     | 16  | 2.47 |

---

*Note.* # = number, CWI = color-word interference test, TMT = trail making test, LD = low demanding test condition, HD = high demanding test condition.

Table S11

*Variance in the Low- and High-Demand Test Conditions of the Three Executive Function Tests Investigated per Age Group.*

| Behavioral Score | Age Group | Variance |
|------------------|-----------|----------|
| 0-back           | Old       | .39      |
|                  | Young     | .79      |
| 1-back           | Old       | .46      |
|                  | Young     | .77      |
| CWI_con          | Old       | .83      |
|                  | Young     | .82      |
| CWI_inc          | Old       | .70      |
|                  | Young     | .39      |
| TMT_con          | Old       | .45      |
|                  | Young     | .29      |
| TMT_switch       | Old       | .59      |
|                  | Young     | .41      |

*Note.* CWI\_con = congruent condition of color word interference test, CWI\_inc = incongruent condition of color word interference test, TMT\_con = consecutive condition of trail making test, TMT\_switch = switching condition of trail making test.
